# Supplementary material for: Magnetic Solid-Phase Microextraction Protocol Based on Didodecyldimethylammonium Bromide-Functionalized Nanoparticles for the Quantification of Epirubicin in Biological Matrices
Source: MDPI journal article supplement (doi:10.3390/pharmaceutics15041227), 2023-04-12
Supplement: s1 [file s1]

*Supplementary Materials*

# **Magnetic Solid-Phase Microextraction Protocol Based on Didodecyldimethylammonium Bromide-Functionalized Nanoparticles for the Quantification of Epirubicin in Biological Matrices**

**Natalia Treder <sup>1,2</sup>, Natalia Szuszczyk <sup>2</sup>, Anna Roszkowska <sup>2</sup>, Ilona Olędzka <sup>2</sup>, Tomasz Bączek <sup>2</sup>,  
Ewa Bień <sup>3</sup>, Małgorzata Anna Krawczyk <sup>3</sup>, Alina Plenis <sup>1\*</sup>**

<sup>1</sup> *Department of Analytical Chemistry, Medical University of Gdansk, Gdansk, Poland*

<sup>2</sup> *Department of Pharmaceutical Chemistry, Medical University of Gdansk, Gdansk, Poland*

<sup>3</sup> *Department of Pediatrics, Hematology and Oncology, Medical University Gdansk, Gdansk, Poland*

\* Corresponding author; Phone +48 58 349 10 96; Fax +48 58 349 15 24

E-mail: [aplenis@gumed.edu.pl](mailto:aplenis@gumed.edu.pl) (A. Plenis)

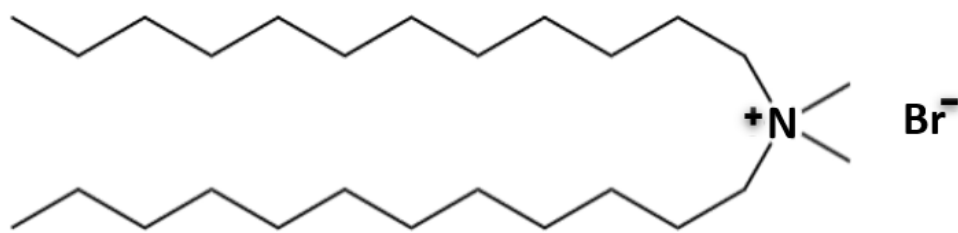

**Figure S1.** Structure of didodecyldimethylammonium bromide

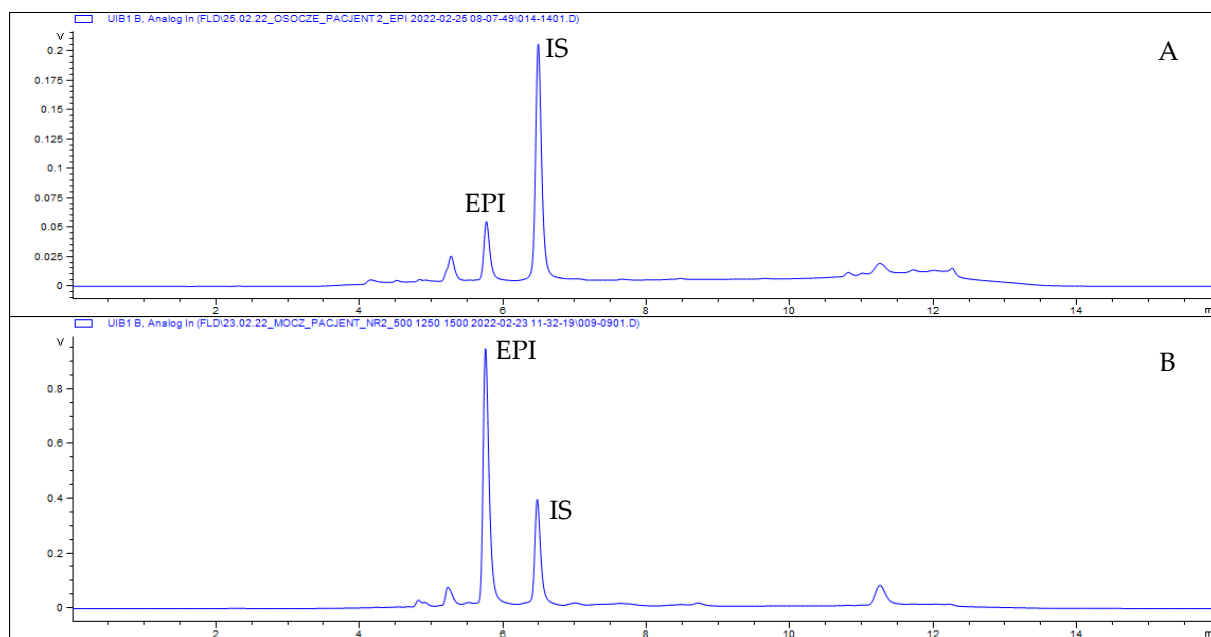

**Figure S2.** LC-FL chromatograms obtained for patient's plasma sample collected 2h after the end of the infusion (A) and for patient's urine samples collected in the range 4-8 h after the end of the infusion (B) (EPI dose: 150 mg/m<sup>2</sup>, first chemotherapy cycle).

**Table S1.** Stability of EPI in human plasma and urine samples under various experimental conditions (mean  $\pm$  SD, n = 3).

| Storage conditions                             | Sample | Conc. added<br>( $\mu\text{g/mL}$ ) | Precision<br>RSD (%) | Accuracy<br>(%) |
|------------------------------------------------|--------|-------------------------------------|----------------------|-----------------|
| Plasma                                         |        |                                     |                      |                 |
| Post-preparative storage (4°C, 24 h)           | LQC    | 0.1                                 | 10.00                | 100             |
|                                                | MQC    | 0.5                                 | 11.11                | 90              |
|                                                | HQC    | 1.0                                 | 9.09                 | 110             |
| Ambient storage (4 h; short-thermal stability) | LQC    | 0.1                                 | 11.11                | 90              |
|                                                | MQC    | 0.5                                 | 10.00                | 100             |
|                                                | HQC    | 1.0                                 | 9.09                 | 110             |
| Long-term stability<br>(-80°C, 2 months)       | LQC    | 0.1                                 | 14.28                | 120             |
|                                                | MQC    | 0.5                                 | 14.28                | 101             |
|                                                | HQC    | 1.0                                 | 12.50                | 98              |
| Three freeze-thaw cycles stability             | LQC    | 0.1                                 | 14.28                | 120             |
|                                                | MQC    | 0.5                                 | 10.00                | 100             |
|                                                | HQC    | 1.0                                 | 11.11                | 110             |
| Urine                                          |        |                                     |                      |                 |
| Post-preparative storage (4°C, 24 h)           | LQC    | 0.5                                 | 5.77                 | 104             |
|                                                | MQC    | 3.0                                 | 5.81                 | 93              |
|                                                | HQC    | 7.5                                 | 6.93                 | 100             |
| Ambient storage (4 h; short-thermal stability) | LQC    | 0.5                                 | 6.38                 | 94.             |
|                                                | MQC    | 3.0                                 | 6.19                 | 108             |
|                                                | HQC    | 7.5                                 | 5.98                 | 98              |
| Long-term stability (-80°C, 2 months)          | LQC    | 0.5                                 | 7.1                  | 112             |
|                                                | MQC    | 3.0                                 | 8.43                 | 110             |
|                                                | HQC    | 7.5                                 | 7.16                 | 99              |
| Three freeze-thaw cycles stability             | LQC    | 0.5                                 | 7.2                  | 96              |
|                                                | MQC    | 3.0                                 | 3.8                  | 93              |
|                                                | HQC    | 7.5                                 | 3.4                  | 98              |
